# Supplementary material for: The enhancement of CdS ultrathin nanosheets photocatalytic activity for water splitting via activating the (001) polar facet by hydrogenation and its charge separation mechanism
Source: Royal Society of Chemistry journal article supplement (doi:10.1039/d4cy00256c), 2024-01-01
Supplement: d4cy00256c1.pdf [file d4cy00256c1.pdf]

## Supporting Information

### **The enhancement of CdS ultrathin nanosheets photocatalytic activity for water splitting via activate (001) polar facet by hydrogenation and its charge separation mechanism**

Zehao Sun,<sup>a</sup> Qi Luo,<sup>a</sup> Xiaohua Meng,<sup>a</sup> Chuanyi Ruan,<sup>a</sup> Shengzhong Liu,<sup>a,b</sup> Bin Liu\*<sup>a</sup>  
and Heqing Yang\*<sup>a</sup>

*<sup>a</sup>Shaanxi Key Laboratory for Advanced Energy Devices; Shaanxi Engineering Laboratory for Advanced Energy Technology; Key Laboratory of Macromolecular Science of Shaanxi Province, School of Materials Science and Engineering, Shaanxi Normal University, Xi'an, 710119, China. E-mail: liubin2016@snnu.edu.cn*

*<sup>b</sup>Key Laboratory of Applied Surface and Colloid Chemistry, National Ministry of Education; Shaanxi Key Laboratory for Advanced Energy Devices; Shaanxi Engineering Lab for Advanced Energy Technology, School of Materials Science and Engineering, Shaanxi Normal University, Xi'an, 710119, China*

†Electronic supplementary information (ESI) available. See DOI:  
**<https://doi.org/xxxxxx>**.

\*Corresponding author

E-mail addresses: liubin2016@snnu.edu.cn, hqyang@snnu.edu.cn

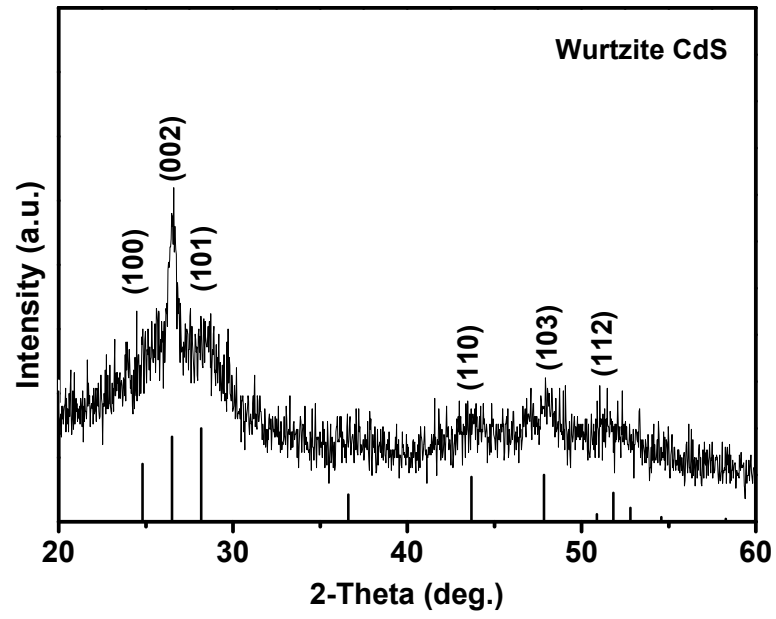

Fig. S1. XRD pattern of CdS samples after 5 cycles test.

**Measurement of Mott–Schottky curve.** The Mott–Schottky plots were measured in the conventional three-electrode glass cell mode on the CHI 760E electrochemical station. The concentration of  $\text{Na}_2\text{SO}_4$  electrolyte solution is 0.5 M.

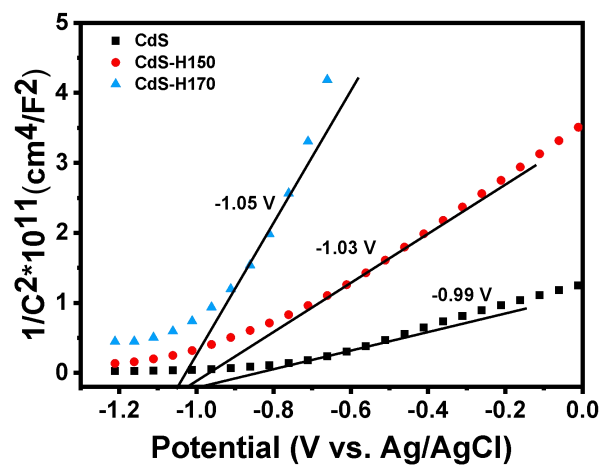

**Fig. S2.** Mott-Schottky plot of CdS, CdS-H150 and CdS-H170 nanosheet film.

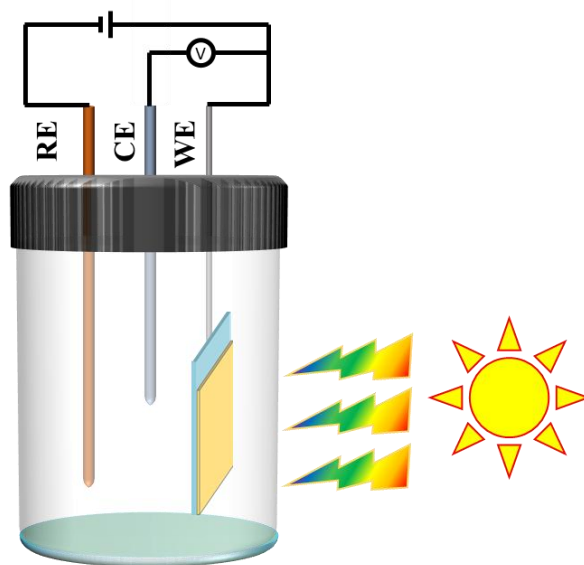

**Counter Electrode (CE) : Ag/AgCl**  
**Reference Electrode (RE) : Calomel Electrode**  
**Working Electrode (WE) : CdS/ITO**  
**Electrolyte Solutions : 0.1 M Na<sub>2</sub>SO<sub>4</sub>**

**Fig. S3.** Schematic diagram of photocurrent measurement device.

**Table S1** The average electron emission lifetime for the CdS, CdS-H150 and CdS-H170 nanosheets.

| Sample   | $\tau_1$ | $\tau_2$ | $\tau_{av}$ |
|----------|----------|----------|-------------|
| CdS      | 0.61     | 5.78     | 6.84        |
| CdS-H150 | 0.79     | 6.17     | 7.05        |
| CdS-H170 | 0.99     | 9.66     | 12.58       |
